# Supplementary material for: Novel Rodent Arterivirus Detected in the Brazilian Amazon
Source: MDPI journal article supplement (doi:10.3390/v15051150), 2023-05-11
Supplement: s1 [file s1]

# Supplementary Figure

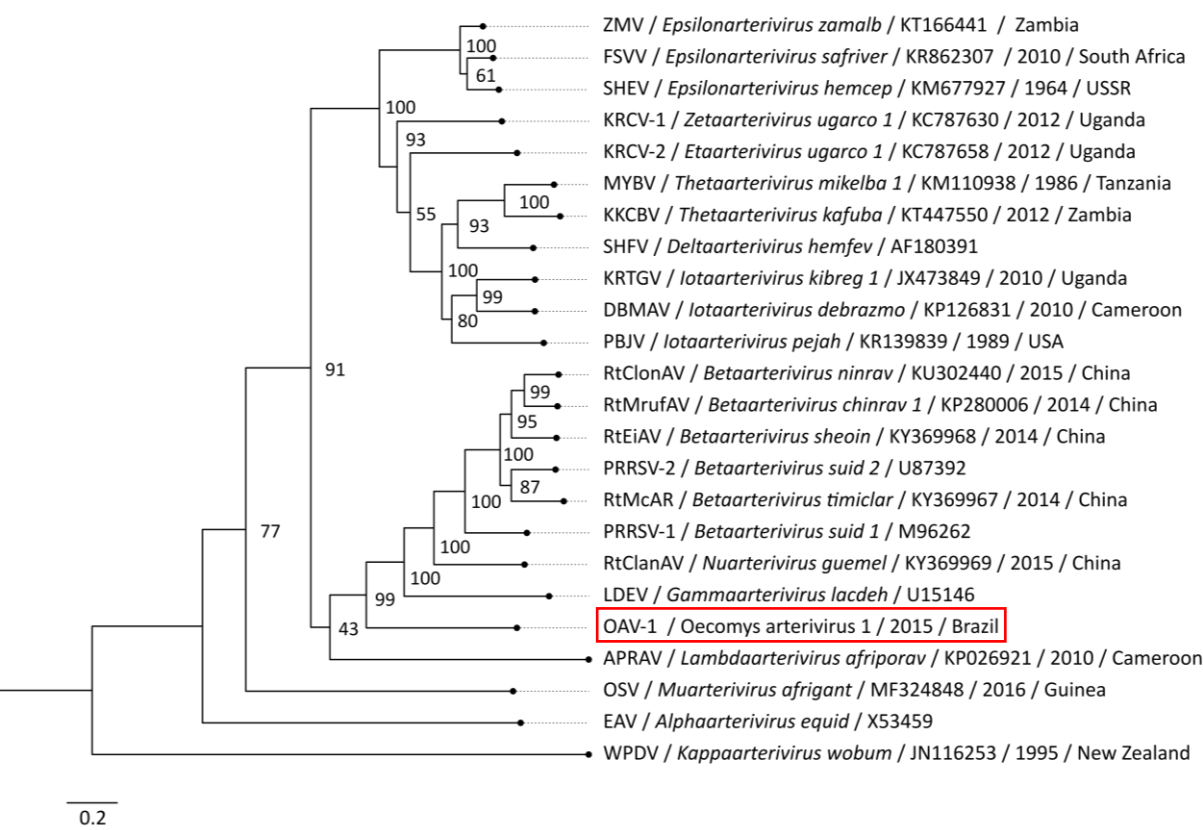

**Figure S1.** Phylogenetic reconstruction based on the polyprotein 1b predicted sequence alignment.
