# Supplementary material for: Novel Rodent Arterivirus Detected in the Brazilian Amazon
Source: Viruses. 2023 May 11;15(5):1150. doi: 10.3390/v15051150 (PMC10222503; doi:10.3390/v15051150)
Supplement: Supplementary file 1 [file viruses-15-01150-s001.zip › Supplementary File.xlsx]

## Sheet: Table S1 - S2
Table S1. Number of reads in each step of analysis.
		Step
	Total reads	Quality filtering (TrimGalore)	rRNA removal (SortMeRNA)	Redundant reads removal (CD-HIT)	Arteriviridae related reads	Manual removal of partially unmatching reads
Number of reads	12,194,274	11,991,001	9,726,803	9,091,069	590	560
Table S2. Coverage metrics for each contig.
Contig	Accession number	Length (nt)	Aligned reads	Coverage	Depth
					Minimal	Maximum
1	OQ686610	8813	428	7.3 x	1	21
2	OQ686611	2332	71	4.6 x	1	14
3	OQ686612	1278	50	5.9 x	1	11
4	OQ686613	490	11	3 x	1	5

## Sheet: Table S3 - Figure S2
Table S3. Identities of the translated sequences of each ORF from OAV-1 and the recognized variarterivirins against PRSSV-1.
	Identities (%)
	Non-structural		Structural
	ORF1a	ORF1b	ORF2a	ORF2b	ORF3	ORF4	ORF5	ORF5a	ORF6	ORF7
Virus	pp1a	pp1b	E	GP2	GP3	GP4	GP5	GP5a	M	N
OAV-1	27.613	52.076	36.986	34.127	26.724	32.787	32.787	44.186	51.429	39.063
LDEV	32.62	54.716	42.857	31.325	31.455	31.148	31.148	30.233	51.429	37.903
RtClan	39.473	61.813	30	22.656	18.605	29.508	29.508	65.116	69.942	53.175
RtMc	45.738	64.208	42.857	21.569	17.293	32.086	32.086	51.163	63.793	59.055
PRRSV-2	43.709	67.693	74.286	60.63	57.087	65.027	65.027	41.304	78.161	59.843
RtEi	43.56	65.96	77.143	77.2	66.792	72.131	72.131	50	79.31	59.843
RtMruf	41.241	66.144	75.714	75.102	62.406	73.37	73.37	46.667	77.586	63.78
RtClon	43.791	66.141	77.143	73.95	68.063	75.956	75.956	46.667	76.437	60.63
Figure S2. Graph of the identities of the translated sequences of each ORF from OAV-1 and the recognized variarterivirins against PRSSV-1.
